# Supplementary material for: Photo-Crosslinked Coumarin-Containing Bis-Urea Amphiphile Hydrogels
Source: MDPI journal article supplement (doi:10.3390/gels8100615), 2022-09-27
Supplement: s1 [file s1]

Supplementary materials

# Photo-Crosslinked Coumarin-Containing Bis-Urea Amphiphile Hydrogels

Jie Liu <sup>1</sup>, Xianwen Lou <sup>1</sup>, Maaïke J. G. Schotman <sup>2</sup>, Patricia P. Marín San Román <sup>1</sup> and Rint P. Sijbesma <sup>1,\*</sup>

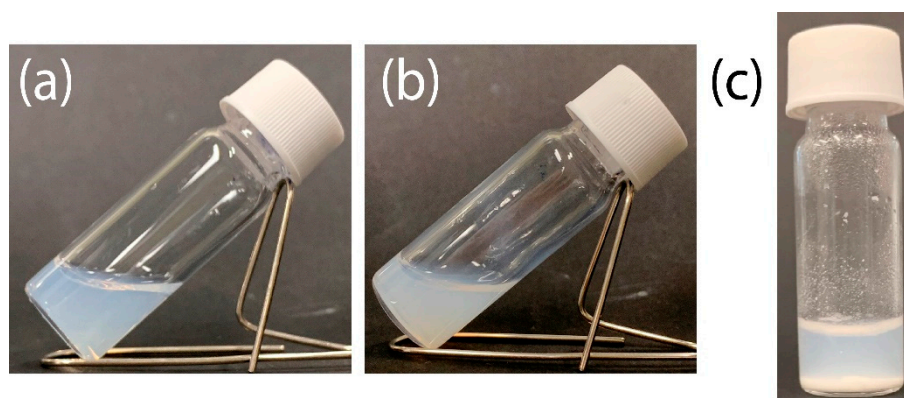

**Figure S1.** Photographs of 30 mg/mL OEG amphiphile (P8-10 OMe) solutions mixing with (a) 5%, (b) 10 % and (c) 20% coumarin based crosslinker, respectively.

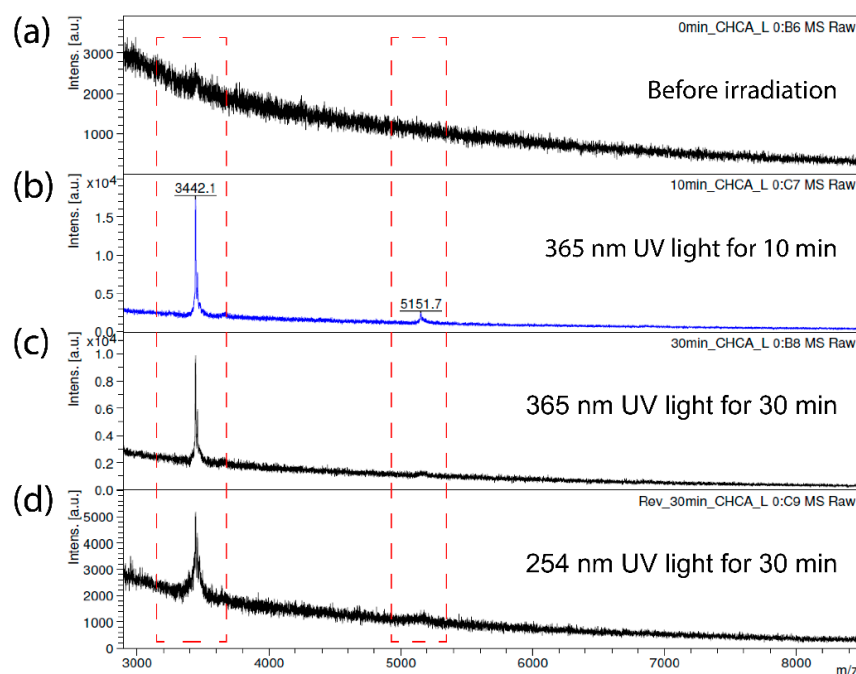

**Figure S2.** Zoom-in MALDI TOF MS results of OEG amphiphile solution containing 10% coumarin crosslinker before irradiation and after irradiation by UV light.
